# Supplementary material for: Germline cis variant determines epigenetic regulation of the anti-cancer drug metabolism gene dihydropyrimidine dehydrogenase (DPYD)
Source: eLife journal article supplement (doi:10.7554/elife.94075), 2024-01-10
Supplement: fig6-data3 [file elife-94075-fig6-data3-v1.pdf]

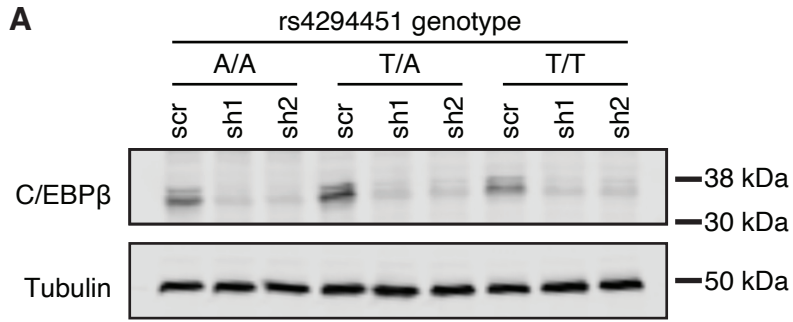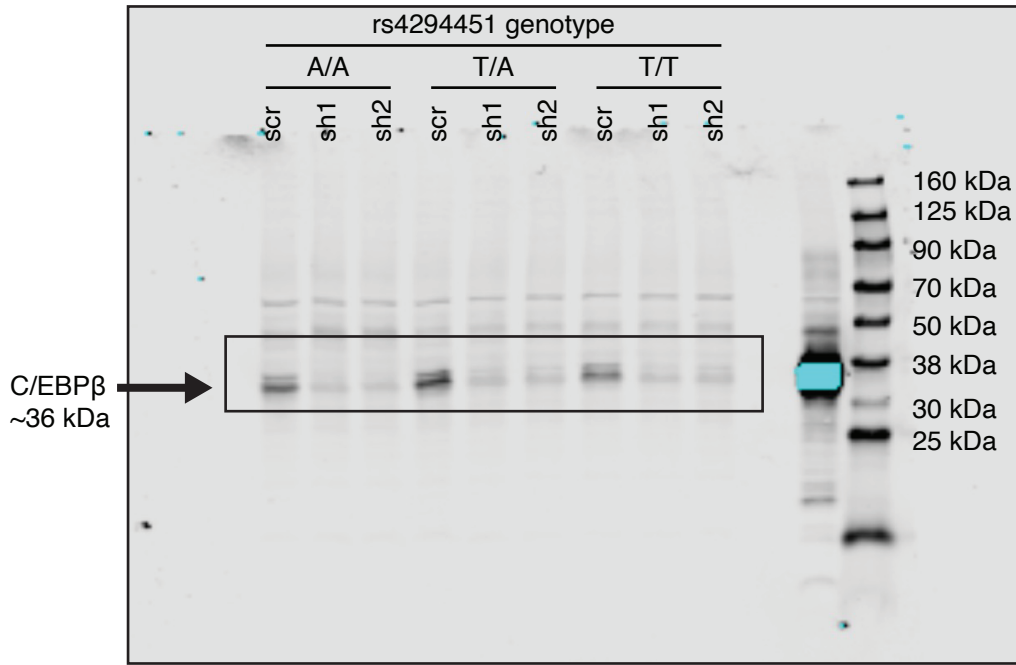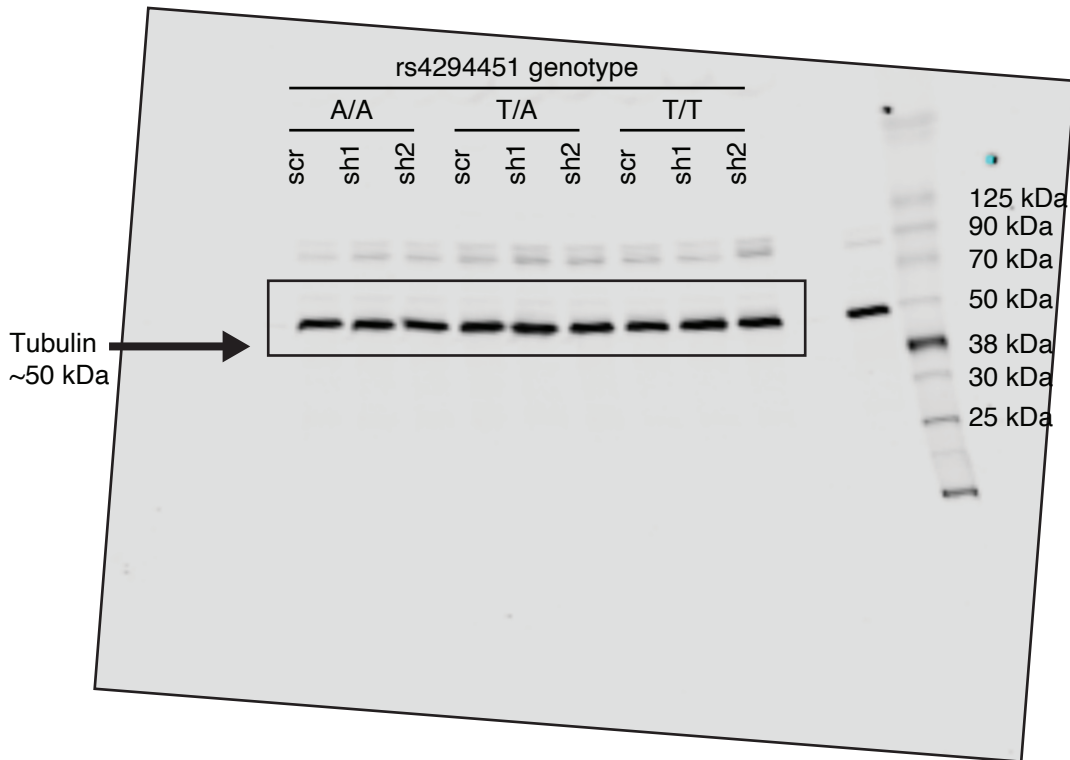

Image rotated -4.5° from scanned original for use in Figure 6A.
